# Supplementary material for: Analysis of Medical Services for Insomnia in Korea: A Retrospective, Cross-Sectional Study Using the Health Insurance Review and Assessment Claims Data
Source: MDPI journal article supplement (doi:10.3390/healthcare10010007), 2021-12-22
Supplement: s1 [file s1]

**Supplementary Table S1.** Characteristics of healthcare utilization.

| Category               |                                             | Total<br>(2010-2016) |       | Western Medicine<br>(2010-2016) |       | Korean Medicine<br>(2010-2016) |       | P-<br>value* |
|------------------------|---------------------------------------------|----------------------|-------|---------------------------------|-------|--------------------------------|-------|--------------|
|                        |                                             | No. of<br>cases      | %     | No. of<br>cases                 | %     | No. of<br>cases                | %     |              |
| Type of<br>visit       | Outpatient                                  | 338,984              | 99.85 | 283,526                         | 99.84 | 55,458                         | 99.92 | <.0001       |
|                        | Inpatient                                   | 508                  | 0.15  | 462                             | 0.16  | 46                             | 0.08  |              |
| Medical<br>institution | Tertiary hospital/general hospital/hospital | 43,753               | 12.89 | 43,608                          | 15.36 | 145                            | 0.26  | <.0001       |
|                        | Clinic                                      | 240,264              | 70.77 | 240,264                         | 84.6  | -                              | -     |              |
|                        | KM hospital                                 | 1,708                | 0.5   | 116                             | 0.04  | 1,592                          | 2.87  |              |
|                        | KM clinic                                   | 537,67               | 15.84 | -                               | -     | 53,767                         | 96.87 |              |

KM=Korean Medicine; \*Chi-square test;

**Supplementary Table S2.** Specific interventions for insomnia of Western and Korean medicine.

| Type | Category                                              | No. of services | Total expenses | No. of patients | Annual expenses per service | Annual expenses per patient |
|------|-------------------------------------------------------|-----------------|----------------|-----------------|-----------------------------|-----------------------------|
| WM   | Individual psychotherapy (supportive therapy)         | 63,478          | \$786,797.12   | 12,568          | 12.39                       | \$62.60                     |
|      | Individual psychotherapy (intensive therapy)          | 13,870          | \$323,320.61   | 5,288           | 23.31                       | \$61.14                     |
|      | Family therapy (individual treatment)                 | 3,029           | \$44,123.78    | 974             | 14.57                       | \$45.30                     |
|      | Individual psychotherapy (intensive analytic therapy) | 1,365           | \$49,853.81    | 797             | 36.52                       | \$62.55                     |
| KM   | Acupuncture                                           | 103,001         | \$408,779.61   | 10,029          | 3.97                        | \$40.76                     |
|      | Moxibustion                                           | 16,544          | \$44,772.76    | 3,542           | 2.71                        | \$12.64                     |
|      | Cupping                                               | 11,254          | \$50,319.11    | 2,587           | 4.47                        | \$19.45                     |
|      | Individual psychotherapy (Ijeong-byeonggi therapy)    | 86              | \$1,008.39     | 31              | 11.73                       | \$32.53                     |
|      | Individual psychotherapy (Jieon-goron therapy)        | 43              | \$523.94       | 18              | 12.18                       | \$29.11                     |
|      | Individual psychotherapy (Gyeongja-pyeongji therapy)  | 42              | \$1,184.12     | 16              | 28.19                       | \$74.01                     |
|      | Individual psychotherapy (Oji-sangseung therapy)      | 31              | \$1,041.67     | 22              | 33.60                       | \$47.35                     |

WM=Western Medicine; KM=Korean Medicine; All cost-related results presented in this study were converted to the 2020 level based on the healthcare and medical service price index, adjusted for healthcare inflation rate and KRW:USD exchange rate (see Supplementary Table 4).

**Supplementary Table S3.** Anatomical Therapeutic Chemical Classification code by insomnia drug category.

| Category                      | ATC codes                                                                                      |
|-------------------------------|------------------------------------------------------------------------------------------------|
| Hypnotics and sedatives       | N05C                                                                                           |
| Antipsychotic drugs           | N05A                                                                                           |
| Antianxiety drugs             | N05B                                                                                           |
| Antidepressants               | N06A                                                                                           |
| Antiseizure drugs             | N03A, N04A                                                                                     |
| Antihistamines                | R06A, R03D                                                                                     |
| Digestive and metabolic drugs | A02A, A02B, A02X, A03A, A03F, A04A, A16A                                                       |
| Musculoskeletal               | M01A, M03B, N02A, N02B                                                                         |
| Respiratory                   | R01B, R05C, R05D, R05F                                                                         |
| Cardiovascular                | C03A, C03C, C04A, C07A, C08C, C10A                                                             |
| Other                         | A10B, A11D, B01A, B05X, G03C, G04C, H02A, J01C, J01D, J01F, N01B, N06B, N06D, N07A, N07B, S01X |

ATC=Anatomical Therapeutic Chemical Classification

**Supplementary Table S4.** Annual average KRW-USD exchange rate and price index of health expenses.

| Year        | KRW/USD        | Healthcare & medical service price index |
|-------------|----------------|------------------------------------------|
| 2010        | 1156.00        | 0.9164                                   |
| 2011        | 1107.99        | 0.9325                                   |
| 2012        | 1126.76        | 0.9410                                   |
| 2013        | 1095.04        | 0.9444                                   |
| 2014        | 1053.12        | 0.9510                                   |
| 2015        | 1131.52        | 0.9629                                   |
| 2016        | 1160.41        | 0.9725                                   |
| :           | :              | :                                        |
| <b>2020</b> | <b>1180.01</b> | <b>1.0000</b>                            |

All cost-related results presented in this study were converted to the 2020 level based on healthcare and medical service price index adjusted for healthcare inflation rate and KRW:USD exchange rate; This information is available on the following site: Korean Statistical Information Service (<http://kosis.kr>);

**Supplementary Figure S1.** General medical service use for insomnia - Number of patients.

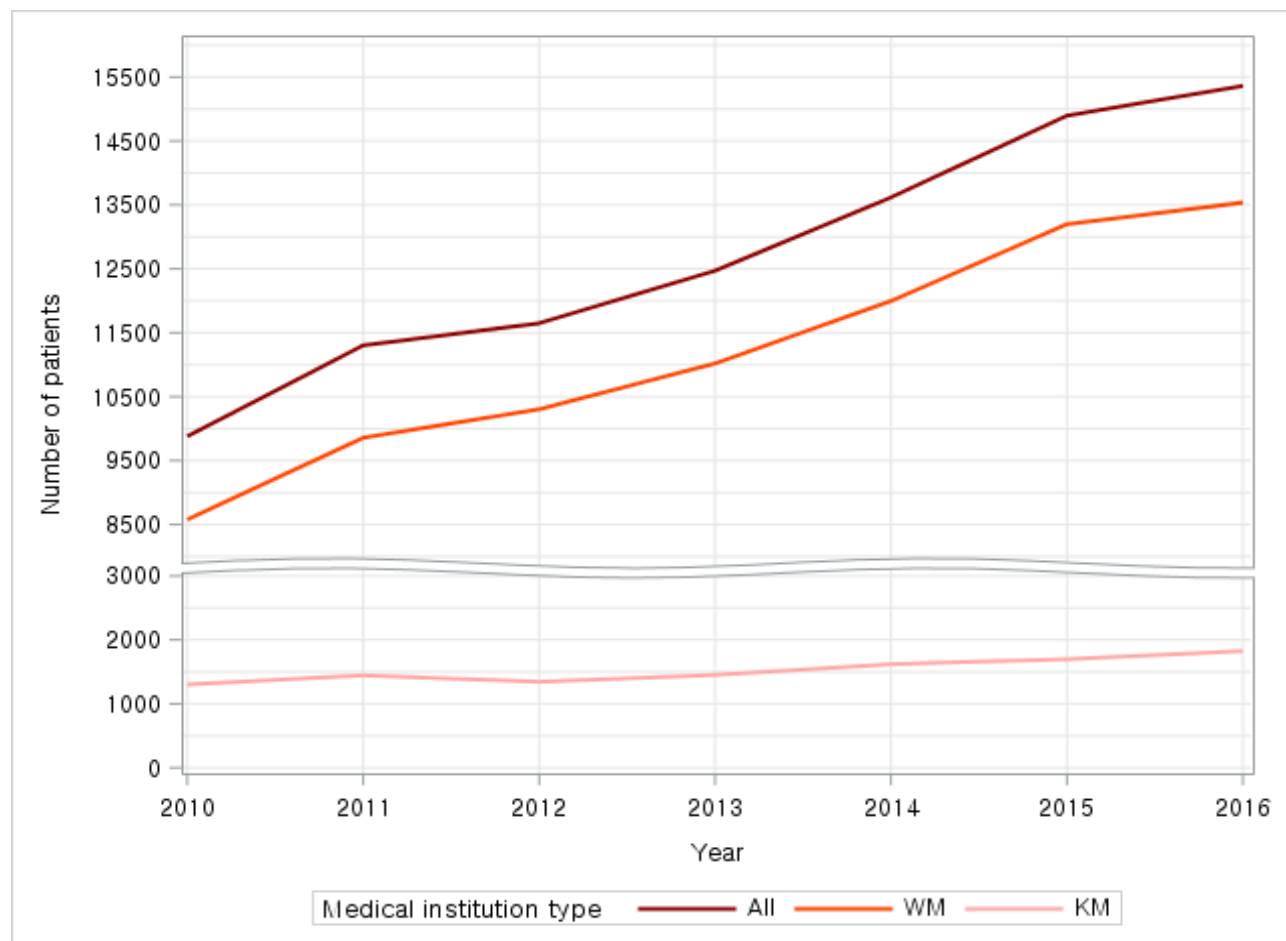

WM=Western Medicine; KM=Korean Medicine

**Supplementary Figure S2.** General medical service use for insomnia - Total expenses

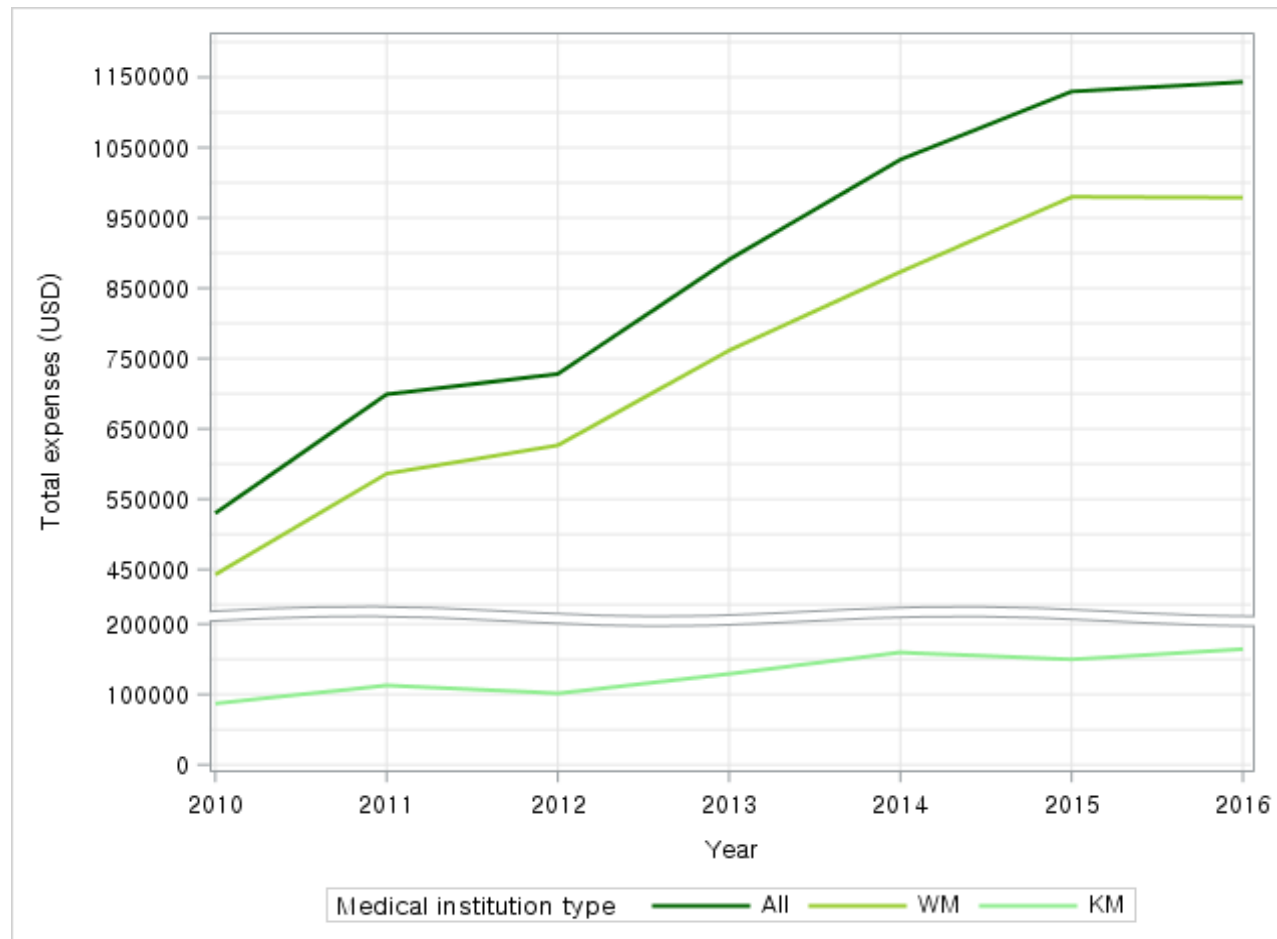

WM=Western Medicine; KM=Korean Medicine

Supplementary Figure S3. General medical service use for insomnia - Annual expenses per patient

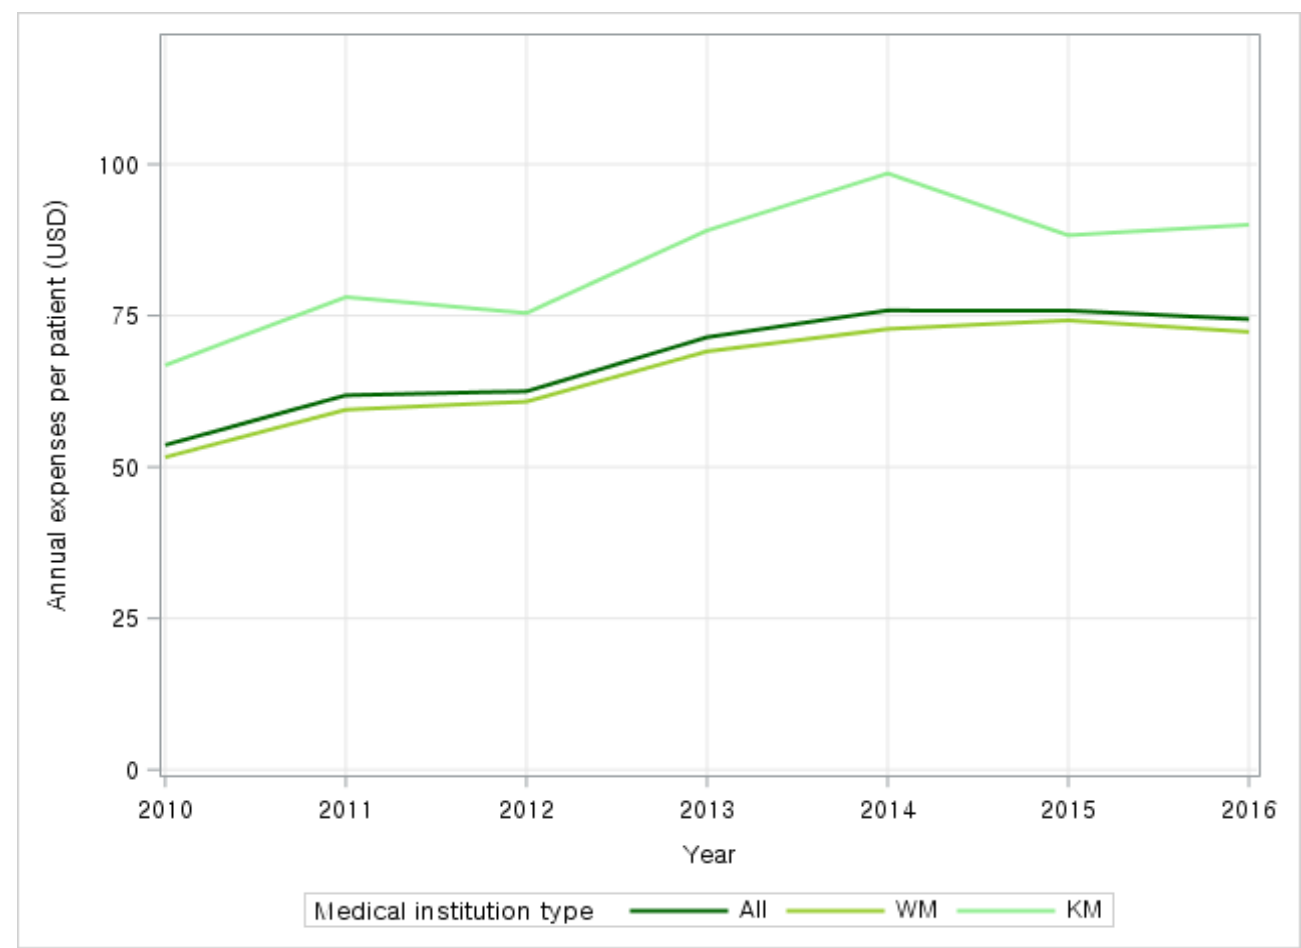

WM=Western Medicine; KM=Korean Medicine

Supplementary Figure S4. General medical service use for insomnia - Annual visits per patient

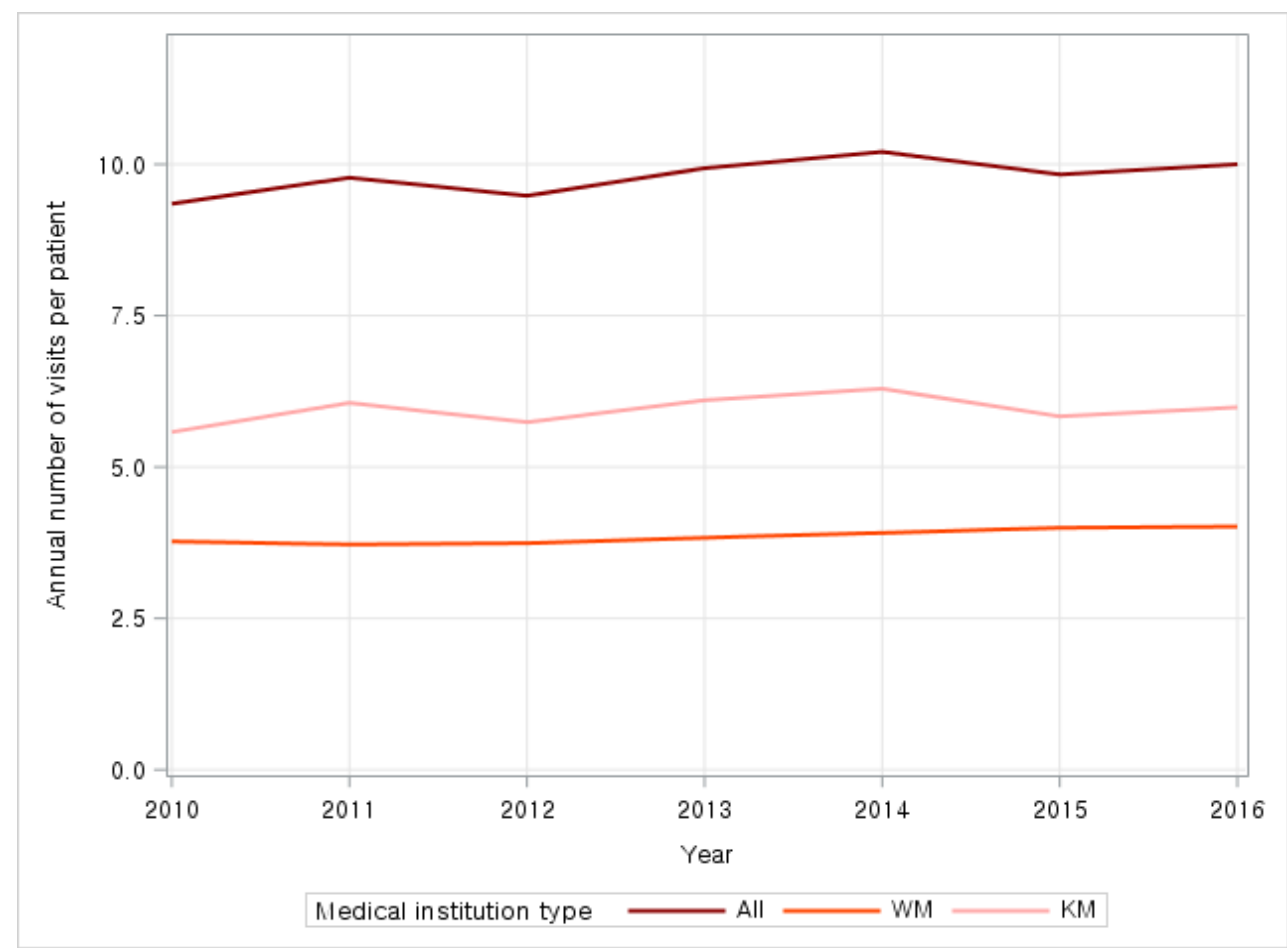

WM=Western Medicine; KM=Korean Medicine
